# Supplementary material for: Planktonic ecological networks support quantification of changes in ecosystem health and functioning
Source: Springer Nature journal article supplement (doi:10.1038/s41598-023-43738-y), 2023-10-04
Supplement: MOESM1 [file 41598_2023_43738_MOESM1_ESM.pdf]

# Supplementary Material

## Planktonic ecological networks support quantification of changes in ecosystem health and functioning

by

Matteo Loschi, Domenico D'Alelio, Elisa Camatti, Fabrizio Bernardi Aubry, Alfred Beran, Simone Libralato

### Methods used to collect original plankton data

Data used to set initial conditions for abundance and biomass were obtained by specific approach for each component of the plankton community. Abundance and Biomass of mixo-dinoflagellates, (Dinoflagellata less than 20  $\mu\text{m}$ ) FN 18 (Table 1), comprising species that can use a mix of different sources of energy and carbon, instead of having a single trophic mode, were obtained following the nanophytoplankton methods.

#### Picophytoplankton (size between 0.2 and 2 $\mu\text{m}$ )

In order to estimate the autotrophic picoplankton abundance, water samples were preserved with pre-filtered buffered formaldehyde, kept in the dark at 4 °C and analyzed within one week. Duplicate slides were prepared from the samples by filtering 5–10 ml of sea water from each sample onto 0.2  $\mu\text{m}$  pore size Nucleopore black membranes. The cell counts were made using a Zeiss Axiovert 35 microscope, equipped with a HBO 50 W light. A BP 450–490 exciter filter, an FT 510 chromatic beam splitter and an LP 520 barrier filter were used. At least 20 randomly selected fields were counted for each slide, at a final  $\times 1000$  magnification to determine abundance. Cell sizes of randomly selected individuals were measured by Image analysis, using Image Pro Express (Media Cybernetics). Most cells were coccoid or rod-shaped; in order to determine their carbon biomass, cell volume was calculated according to Tamigneaux et al. (1995)<sup>1</sup>.

#### Heterotrophic picoplankton (size between 0.2 and 2 $\mu\text{m}$ )

10 mL seawater samples were fixed with pre-filtered borate-buffered formalin (0.2  $\mu\text{m}$ ) at 2% of the final concentration and stained for 15 min with 4'6-diamidino-2-phenylindole (DAPI, Sigma), final concentration 1  $\mu\text{g ml}^{-1}$ <sup>2</sup>. Samples were filtered in triplicate through 0.2  $\mu\text{m}$  black colored polycarbonate filters (Nucleopore) and stored at -20 °C. The filters were mounted on slides and analyzed under a microscope (Olympus BX 60 F5 epifluorescence microscope at 1000x) and counted under a UV filter set (BP 330–385 nm). A minimum of 300 cells from at least 20 random fields were counted for each filter. The bacterial biomass was obtained by multiplying the bacterial abundance<sup>4–6</sup> by the conversion factor of 20 fgC cell<sup>-1</sup><sup>3</sup>.

#### Nano- (size between 2 and 20 $\mu\text{m}$ ) and microphytoplankton (size between 20 and 200 $\mu\text{m}$ )

Nano- and microphytoplankton were fixed in formalin neutralized with hexamethylenetetramine and recognized and counted with an inverted microscope<sup>4–6</sup>. The taxa composition was mainly performed

according to Tomas (1997). At least 200 organisms (often more than 500) were counted for each sample, expressing the abundance in  $l^{-1}$  cells. Morphometric measurements of phytoplankton cells were performed by image analysis, with a digital color camera (Go Cameras Go-5). For each species, linear dimensions ( $\mu m$ ) were obtained by direct measurement. From these measurements we calculated the biovolume of the organism ( $V$ ;  $\mu m^3$ ) according to Strathmann (1967)<sup>7</sup>. Through the average cell biovolume we calculated the carbon content using the formulas introduced by Smetacek (1975)<sup>8</sup>.

### **Heterotrophic nanoplankton (size between 2 and 20 $\mu m$ )**

The water samples were preserved with glutaraldehyde (10% final concentration) and stained with DAPI at a final concentration of  $1 \mu g ml^{-1}$ . After filtering 20 ml from each sample through black prestained Nucleopore polycarbonate filters (0.8  $\mu m$  pore size, 25 mm diameter), duplicate slides were prepared. Cell counts were performed using a Zeiss Axiovert 35 microscope, equipped with a 100 W HBO light, a BP 365/12 exciter filter, an FT 395 chromatic beam splitter and an LP 397 barrier filter. The cell size measurements were done individually. Cell volume was calculated on approximately 200 cells (randomly selected over a variable number of microscopic fields) from a two-dimensional cellular image. The organic carbon values were obtained by multiplying the cell volume by 0.14 as indicated by Edler (1979)<sup>9</sup>.

### **Microzooplankton (size between 20 and 200 $\mu m$ )**

Abundance and biomass of microzooplankton was determined using 2 l samples fixed with hexamethylenetetramine-buffered formaldehyde at a final concentration of 1.5%. After a first step of pre-concentration via sedimentation to 200 ml, at least 50 ml were settled in sedimentation chambers and counted following the method according to Utermöhl (1958)<sup>4</sup>. Samples were examined with a ZEISS IM135 inverted microscope at 200x. For the determination of the biomass cells were measured and grouped according to standardized geometrical forms. Cell volume was transformed into carbon biomass using the conversion factor of  $14 \text{ pg C } \mu m^{-3}$ <sup>10</sup> for aloricates and the formula  $444.5 \text{ pg C} + (\text{lorica volume in } \mu m^{-3} \times 0.053 \text{ pg C})$  for loricate ciliates<sup>11</sup>.

### **Meso- (size between 0.20 and 20 mm) and macrozooplankton (size between 2 and 20 mm)**

Meso- and macrozooplankton samples were collected at the surface (0.5 m depth) by an Apstein standard net (diameter 0.4 m), equipped with a flowmeter (HydroBios) to measure the volume of water filtered. Samples were preserved in formaldehyde (4% final concentration). In the laboratory, the organisms were subsampled and at least two subsamples were counted completely and identified, according to the International Council for the Exploration of the Sea (ICES) protocol to species level, where possible, or to higher taxonomic levels<sup>12</sup>.

The meso- and macrozooplankton averaged Carbon-biomasses were estimated by multiplying the average abundance of each FN i) the carbon-per-individual quota for the same FNs as derived from published data<sup>13-17</sup>; and ii) the vertical extension of the water-layer within which these organisms were sampled at Palude della Rosa (about 0.5 m). In case of multi-species FNs (44-46), the average carbon per individual was estimated taking into account the quantitative proportion of each species based on not-aggregated abundance data.

### **Non-living groups**

The total amount of non-living organic matter was estimated by subtracting the total amount of biomass allocated within unicellular plankton biomass from the POC. The biomass of the two different categories of faecal pellets (i.e., size less or greater than 200 µm in size) was estimated with the formula:

$$B_{\text{faecal pellets}} = B_{\text{animal}} \cdot \alpha_{\text{animal}} \cdot \epsilon_{\text{animal}}$$

where  $\alpha$  and  $\epsilon$  were the consumption rate per biomass unit and the unassimilated fraction of biomass consumed by the animal, respectively. More details can be found in D'Alelio et al. (2016)<sup>14</sup>.

## Bibliography

1. Tamigneaux, E., Vazquez, E., Mingelbier, M., Klein, B. & Legendre, L. Environmental control of phytoplankton assemblages in nearshore marine waters, with special emphasis on phototrophic ultraplankton. *J. Plankton Res.* **17**, 1421–1448 (1995).
2. Porter, K. G. & Feig, Y. S. The use of DAPI for identifying and counting aquatic microflora. *Limnol. Oceanogr.* **25**, 943–948 (1980).
3. Lee, S. & Fuhrman, J. A. Relationships between Biovolume and Biomass of Naturally Derived Marine Bacterioplankton. *Appl. Environ. Microbiol.* **53**, 1298–1303 (1987).
4. Utermöhl, H. Zur Vervollkommnung der quantitativen Phytoplankton-Methodik. *Mitteilungen - Int. Vereinigung für Theor. und Angew. Limnol.* **9**, 1–38 (1958).
5. Thronsdon, J. Preservation and storage. in *Monographs on Oceanographic Methodology 6. Phytoplankton Manual* (ed. Sournia, A.) 69–74 (Unesco, 1978). doi:10.1002/iroh.19800650312
6. Zingone, A. et al. Fitoplancton: metodiche di analisi quali-quantitativa. in *Metodologie di campionamento e di studio del plancton marino* (eds. Socal, G. et al.) 213–237 (ISPRA, 2010).
7. Strathmann, R. R. ESTIMATING THE ORGANIC CARBON CONTENT OF PHYTOPLANKTON FROM CELL VOLUME OR PLASMA VOLUME. *Limnol. Oceanogr.* **12**, 411–418 (1967).
8. Smetacek, V. Die Sukzession des Phytoplanktons in der westlichen Kieler Bucht. (Kiel University, 1975).
9. Edler, L. *Recommendations on Methods for Marine Biological Studies in the Baltic Sea: Phytoplankton and chlorophyll*. (The Baltic Marine Biologists, 1979).
10. Putt, M. & Stoecker, D. K. An experimentally determined carbon : volume ratio for marine “oligotrichous” ciliates from estuarine and coastal waters. *Limnol. Oceanogr.* **34**, 1097–1103 (1989).
11. Verity, P. G. & Langdon, C. Relationships between lorica volume, carbon, nitrogen, and ATP content of tintinnids In Narragansett Bay. *J. Plankton Res.* **6**, 859–868 (1984).
12. *ICES Zooplankton Methodology Manual*. (Academic Press, 2000). doi:10.1016/B978-0-12-327645-2.X5000-2
13. Almeda, R. et al. Trophic role and carbon budget of metazoan microplankton in northwest Mediterranean coastal waters. *Limnol. Oceanogr.* **56**, 415–430 (2011).
14. D'Alelio, D., Libralato, S., Wyatt, T. & Ribera d'Alcalà, M. Ecological-network models link diversity, structure and function in the plankton food-web. *Sci. Rep.* **6**, 21806 (2016).
15. Riccardi, N. Selectivity of plankton nets over mesozooplankton taxa: implications for abundance, biomass and diversity estimation. *J. Limnol.* **69**, 287–296 (2010).
16. Robert, D., Castonguay, M. & Fortier, L. Effects of intra- and inter-annual variability in prey field on the feeding selectivity of larval Atlantic mackerel (*Scomber scombrus*). *J. Plankton Res.* **30**, 673–688 (2008).
17. Heidelberg, K. B., O'Neil, K. L., Bythell, J. C. & Sebens, K. P. Vertical distribution and diel patterns of zooplankton abundance and biomass at Conch Reef, Florida Keys (USA). *J. Plankton Res.* **32**, 75–91 (2010).

## Supplementary Data

Maximum and minimum input values of metabolic parameters ( $\mu$  is the production rate per biomass unit,  $\alpha$  is the consumption rate per biomass unit,  $\epsilon$  is the unassimilated fraction of biomass consumed, and  $ph$  is the phototrophy proportion in individual metabolism) in 2005 and 2007 for each functional node (FN)

2005

| Maximum values   | FN  | $\mu$ (d <sup>-1</sup> ) | $\alpha$ (d <sup>-1</sup> ) | $\epsilon$ | $ph$  |    | Minimum values   | FN  | $\mu$ (d <sup>-1</sup> ) | $\alpha$ (d <sup>-1</sup> ) | $\epsilon$ | $ph$  |
|------------------|-----|--------------------------|-----------------------------|------------|-------|----|------------------|-----|--------------------------|-----------------------------|------------|-------|
| Living nodes     | 1   | 1,2                      | 0                           | 0,01       | 1,000 |    | Living nodes     | 1   | 0,6                      | 0                           | 0,01       | 1,000 |
|                  | 6   | 1,3                      | 0                           | 0,01       | 1,000 |    |                  | 6   | 0,7                      | 0                           | 0,01       | 1,000 |
|                  | 8   | 1,59                     | 0                           | 0,01       | 1,000 |    |                  | 8   | 0,8                      | 0                           | 0,01       | 1,000 |
|                  | 9   | 1,46                     | 0                           | 0,01       | 1,000 |    |                  | 9   | 0,7                      | 0                           | 0,01       | 1,000 |
|                  | 10  | 2,15                     | 0                           | 0,01       | 1,000 |    |                  | 10  | 1,1                      | 0                           | 0,01       | 1,000 |
|                  | 14  | 1,39                     | 0                           | 0,01       | 1,000 |    |                  | 14  | 0,7                      | 0                           | 0,01       | 1,000 |
|                  | 16  | 1,5                      | 0                           | 0,01       | 1,000 |    |                  | 16  | 0,8                      | 0                           | 0,01       | 1,000 |
|                  | 17  | 1,9                      | 0                           | 0,01       | 1,000 |    |                  | 17  | 1                        | 0                           | 0,01       | 1,000 |
|                  | 23  | 1,46                     | 0,09                        | 0,01       | 0,950 |    |                  | 23  | 0,7                      | 0,05                        | 0,01       | 0,950 |
|                  | 24  | 0,98                     | 4,7                         | 0,01       | 0,000 |    |                  | 24  | 0,5                      | 2,35                        | 0,01       | 0,000 |
|                  | 26  | 0,875                    | 3,5                         | 0,01       | 0,000 |    |                  | 26  | 0,9                      | 3,5                         | 0,01       | 0,000 |
|                  | 28  | 2,15                     | 3                           | 0,01       | 0,300 |    |                  | 28  | 1,1                      | 1,5                         | 0,01       | 0,300 |
|                  | 29  | 2,04                     | 3,84                        | 0,01       | 0,000 |    |                  | 29  | 1                        | 1,92                        | 0,01       | 0,000 |
|                  | 32  | 1,66                     | 7,3                         | 0,01       | 0,000 |    |                  | 32  | 0,8                      | 3,65                        | 0,01       | 0,000 |
|                  | 33  | 1,66                     | 7,3                         | 0,01       | 0,000 |    |                  | 33  | 0,8                      | 3,65                        | 0,01       | 0,000 |
|                  | 34  | 1,76                     | 1,8                         | 0,01       | 0,000 |    |                  | 34  | 0,9                      | 0,9                         | 0,01       | 0,000 |
|                  | 35  | 1,68                     | 7                           | 0,2        | 0,000 |    |                  | 35  | 0,1                      | 0,7                         | 0,2        | 0,000 |
|                  | 36  | 1,66                     | 8,05                        | 0,27       | 0,000 |    |                  | 36  | 0,2                      | 0,81                        | 0,27       | 0,000 |
|                  | 37  | 0,42                     | 2,03                        | 0,27       | 0,000 |    |                  | 37  | 0                        | 0,2                         | 0,27       | 0,000 |
|                  | 38  | 1,37                     | 8,98                        | 0,55       | 0,000 |    |                  | 38  | 0,1                      | 0,9                         | 0,3        | 0,000 |
|                  | 39  | 1,37                     | 8,82                        | 0,55       | 0,000 |    |                  | 39  | 0,1                      | 0,88                        | 0,3        | 0,000 |
|                  | 40  | 0,27                     | 1,18                        | 0,55       | 0,000 |    |                  | 40  | 0                        | 0,12                        | 0,45       | 0,000 |
|                  | 41  | 0,25                     | 1,31                        | 0,55       | 0,000 |    |                  | 41  | 0                        | 0,13                        | 0,45       | 0,000 |
|                  | 42  | 0,27                     | 1,17                        | 0,55       | 0,000 |    |                  | 42  | 0                        | 0,12                        | 0,45       | 0,000 |
|                  | 43  | 0,09                     | 1,23                        | 0,35       | 0,000 |    |                  | 43  | 0                        | 0,12                        | 0,24       | 0,000 |
|                  | 44  | 0,0075                   | 0,05                        | 0,2        | 0,000 |    |                  | 44  | 0                        | 0,01                        | 0,18       | 0,000 |
|                  | 45  | 0,42                     | 7                           | 0,2        | 0,000 |    |                  | 45  | 0,1                      | 0,7                         | 0,2        | 0,000 |
|                  | 47  | 0,42                     | 7                           | 0,2        | 0,000 |    |                  | 47  | 0,1                      | 0,7                         | 0,2        | 0,000 |
|                  | 48  | 0,29                     | 1,55                        | 0,35       | 0,000 |    |                  | 48  | 0,1                      | 0,16                        | 0,24       | 0,000 |
| 49               | 0,9 | 3,6                      | 0,01                        | 0,000      |       | 49 | 0,9              | 3,6 | 0,01                     | 0,000                       |            |       |
| Non-living nodes | 50  | 0                        | 0                           | 0          | -1,00 |    | Non-living nodes | 50  | 0                        | 0                           | 0          | -1,00 |
|                  | 51  | 0                        | 0                           | 0          | -1,00 |    |                  | 51  | 0                        | 0                           | 0          | -1,00 |
|                  | 52  | 0                        | 0                           | 0          | -1,00 |    |                  | 52  | 0                        | 0                           | 0          | -1,00 |
|                  | 53  | 0                        | 0                           | 0          | -1,00 |    |                  | 53  | 0                        | 0                           | 0          | -1,00 |

| Maximum values | FN               | $\mu$ (d <sup>-1</sup> ) | $\alpha$ (d <sup>-1</sup> ) | $\epsilon$ | ph    |       | Minimum values | FN | $\mu$ (d <sup>-1</sup> ) | $\alpha$ (d <sup>-1</sup> ) | $\epsilon$ | ph    |   |       |
|----------------|------------------|--------------------------|-----------------------------|------------|-------|-------|----------------|----|--------------------------|-----------------------------|------------|-------|---|-------|
| Living nodes   | 1                | 1,2                      | 0                           | 0,01       | 1,000 |       | Living nodes   | 1  | 0,6                      | 0                           | 0,01       | 1,000 |   |       |
|                | 2                | 1,3                      | 0                           | 0,01       | 1,000 |       |                | 2  | 0,7                      | 0                           | 0,01       | 1,000 |   |       |
|                | 3                | 1,88                     | 0                           | 0,01       | 1,000 |       |                | 3  | 0,9                      | 0                           | 0,01       | 1,000 |   |       |
|                | 4                | 1,75                     | 0                           | 0,01       | 1,000 |       |                | 4  | 0,9                      | 0                           | 0,01       | 1,000 |   |       |
|                | 5                | 1,18                     | 0                           | 0,01       | 1,000 |       |                | 5  | 0,6                      | 0                           | 0,01       | 1,000 |   |       |
|                | 6                | 1,3                      | 0                           | 0,01       | 1,000 |       |                | 6  | 0,7                      | 0                           | 0,01       | 1,000 |   |       |
|                | 7                | 1,08                     | 0                           | 0,01       | 1,000 |       |                | 7  | 0,5                      | 0                           | 0,01       | 1,000 |   |       |
|                | 8                | 1,59                     | 0                           | 0,01       | 1,000 |       |                | 8  | 0,8                      | 0                           | 0,01       | 1,000 |   |       |
|                | 9                | 1,46                     | 0                           | 0,01       | 1,000 |       |                | 9  | 0,7                      | 0                           | 0,01       | 1,000 |   |       |
|                | 11               | 2,58                     | 0                           | 0,01       | 1,000 |       |                | 11 | 1,3                      | 0                           | 0,01       | 1,000 |   |       |
|                | 12               | 1,93                     | 0                           | 0,01       | 1,000 |       |                | 12 | 1                        | 0                           | 0,01       | 1,000 |   |       |
|                | 13               | 1,59                     | 0                           | 0,01       | 1,000 |       |                | 13 | 0,8                      | 0                           | 0,01       | 1,000 |   |       |
|                | 14               | 1,39                     | 0                           | 0,01       | 1,000 |       |                | 14 | 0,7                      | 0                           | 0,01       | 1,000 |   |       |
|                | 15               | 1,69                     | 0                           | 0,01       | 1,000 |       |                | 15 | 0,9                      | 0                           | 0,01       | 1,000 |   |       |
|                | 16               | 1,5                      | 0                           | 0,01       | 1,000 |       |                | 16 | 0,8                      | 0                           | 0,01       | 1,000 |   |       |
|                | 17               | 1,9                      | 0                           | 0,01       | 1,000 |       |                | 17 | 1                        | 0                           | 0,01       | 1,000 |   |       |
|                | 18               | 0,94                     | 2,85                        | 0,01       | 0,500 |       |                | 18 | 0,5                      | 1,43                        | 0,01       | 0,500 |   |       |
|                | 19               | 0,68                     | 4,88                        | 0,01       | 0,000 |       |                | 19 | 0,3                      | 2,44                        | 0,01       | 0,000 |   |       |
|                | 20               | 2,36                     | 7,08                        | 0,01       | 0,000 |       |                | 20 | 1,2                      | 7,08                        | 0,01       | 0,000 |   |       |
|                | 21               | 0,735                    | 3,525                       | 0,01       | 0,000 |       |                | 21 | 0,7                      | 3,525                       | 0,01       | 0,000 |   |       |
|                | 22               | 1,46                     | 0,09                        | 0,01       | 0,950 |       |                | 22 | 0,7                      | 0,05                        | 0,01       | 0,950 |   |       |
|                | 24               | 0,98                     | 4,7                         | 0,01       | 0,000 |       |                | 24 | 0,5                      | 2,35                        | 0,01       | 0,000 |   |       |
|                | 25               | 0,98                     | 4,7                         | 0,01       | 0,000 |       |                | 25 | 0,5                      | 2,35                        | 0,01       | 0,000 |   |       |
|                | 26               | 0,735                    | 3,525                       | 0,01       | 0,000 |       |                | 26 | 0,7                      | 3,525                       | 0,01       | 0,000 |   |       |
|                | 27               | 1,74                     | 3,84                        | 0,01       | 0,000 |       |                | 27 | 0,9                      | 1,92                        | 0,01       | 0,000 |   |       |
|                | 28               | 1,97                     | 3                           | 0,01       | 0,300 |       |                | 28 | 1                        | 1,5                         | 0,01       | 0,300 |   |       |
|                | 29               | 1,95                     | 3,84                        | 0,01       | 0,000 |       |                | 29 | 1                        | 1,92                        | 0,01       | 0,000 |   |       |
|                | 30               | 1,59                     | 3                           | 0,01       | 0,300 |       |                | 30 | 0,8                      | 1,5                         | 0,01       | 0,300 |   |       |
|                | 31               | 1,74                     | 3,84                        | 0,01       | 0,000 |       |                | 31 | 0,9                      | 1,92                        | 0,01       | 0,000 |   |       |
|                | 32               | 1,66                     | 7,3                         | 0,01       | 0,000 |       |                | 32 | 0,8                      | 3,65                        | 0,01       | 0,000 |   |       |
|                | 33               | 1,66                     | 7,3                         | 0,01       | 0,000 |       |                | 33 | 0,8                      | 3,65                        | 0,01       | 0,000 |   |       |
|                | 34               | 1,76                     | 1,8                         | 0,01       | 0,000 |       |                | 34 | 0,9                      | 0,9                         | 0,01       | 0,000 |   |       |
|                | 35               | 1,68                     | 7                           | 0,2        | 0,000 |       |                | 35 | 0,1                      | 0,7                         | 0,2        | 0,000 |   |       |
|                | 36               | 1,64                     | 8,74                        | 0,27       | 0,000 |       |                | 36 | 0,2                      | 0,87                        | 0,27       | 0,000 |   |       |
|                | 37               | 0,41                     | 2,18                        | 0,27       | 0,000 |       |                | 37 | 0                        | 0,22                        | 0,27       | 0,000 |   |       |
|                | 39               | 1,37                     | 8,82                        | 0,55       | 0,000 |       |                | 39 | 0,1                      | 0,88                        | 0,3        | 0,000 |   |       |
|                | 40               | 0,17                     | 0,84                        | 0,55       | 0,000 |       |                | 40 | 0                        | 0,08                        | 0,45       | 0,000 |   |       |
|                | 41               | 0,16                     | 0,93                        | 0,55       | 0,000 |       |                | 41 | 0                        | 0,09                        | 0,45       | 0,000 |   |       |
|                | 42               | 0,18                     | 0,83                        | 0,55       | 0,000 |       |                | 42 | 0                        | 0,08                        | 0,45       | 0,000 |   |       |
|                | 43               | 0,08                     | 1,23                        | 0,35       | 0,000 |       |                | 43 | 0                        | 0,12                        | 0,24       | 0,000 |   |       |
|                | 44               | 0,0075                   | 0,05                        | 0,2        | 0,000 |       |                | 44 | 0                        | 0,01                        | 0,18       | 0,000 |   |       |
|                | 46               | 0,42                     | 7                           | 0,2        | 0,000 |       |                | 46 | 0,1                      | 0,7                         | 0,2        | 0,000 |   |       |
|                | 47               | 0,42                     | 7                           | 0,2        | 0,000 |       |                | 47 | 0,1                      | 0,7                         | 0,2        | 0,000 |   |       |
|                | 48               | 0,22                     | 1,33                        | 0,35       | 0,000 |       |                | 48 | 0,1                      | 0,13                        | 0,24       | 0,000 |   |       |
|                | 49               | 0,9                      | 3,6                         | 0,01       | 0,000 |       |                | 49 | 0,9                      | 3,6                         | 0,01       | 0,000 |   |       |
|                | Non-living nodes | 50                       | 0                           | 0          | 0     | -1,00 |                |    | Non-living nodes         | 50                          | 0          | 0     | 0 | -1,00 |
|                |                  | 51                       | 0                           | 0          | 0     | -1,00 |                |    |                          | 51                          | 0          | 0     | 0 | -1,00 |
|                |                  | 52                       | 0                           | 0          | 0     | -1,00 |                |    |                          | 52                          | 0          | 0     | 0 | -1,00 |
|                |                  | 53                       | 0                           | 0          | 0     | -1,00 |                |    |                          | 53                          | 0          | 0     | 0 | -1,00 |

**Maximum and minimum input values of proportions of flows to non-living nodes ( $\gamma$ ) in 2005 and 2007 for each functional node (FN)**

**2005**

| <b>Maximum values</b>   | FN    | 50    | 51    | 52    | 53    | SUM   |    | <b>Minimum values</b>   | FN    | 50    | 51    | 52    | 53    | SUM   |
|-------------------------|-------|-------|-------|-------|-------|-------|----|-------------------------|-------|-------|-------|-------|-------|-------|
| <b>Living nodes</b>     | 1     | 0,000 | 0,000 | 0,870 | 0,130 | 1,000 |    | <b>Living nodes</b>     | 1     | 0,000 | 0,000 | 0,870 | 0,130 | 1,000 |
|                         | 6     | 0,000 | 0,000 | 0,870 | 0,130 | 1,000 |    |                         | 6     | 0,000 | 0,000 | 0,870 | 0,130 | 1,000 |
|                         | 8     | 0,000 | 0,000 | 0,870 | 0,130 | 1,000 |    |                         | 8     | 0,000 | 0,000 | 0,870 | 0,130 | 1,000 |
|                         | 9     | 0,000 | 0,000 | 0,870 | 0,130 | 1,000 |    |                         | 9     | 0,000 | 0,000 | 0,870 | 0,130 | 1,000 |
|                         | 10    | 0,000 | 0,000 | 0,870 | 0,130 | 1,000 |    |                         | 10    | 0,000 | 0,000 | 0,870 | 0,130 | 1,000 |
|                         | 14    | 0,000 | 0,000 | 0,870 | 0,130 | 1,000 |    |                         | 14    | 0,000 | 0,000 | 0,870 | 0,130 | 1,000 |
|                         | 16    | 0,000 | 0,000 | 0,870 | 0,130 | 1,000 |    |                         | 16    | 0,000 | 0,000 | 0,870 | 0,130 | 1,000 |
|                         | 17    | 0,000 | 0,000 | 0,870 | 0,130 | 1,000 |    |                         | 17    | 0,000 | 0,000 | 0,870 | 0,130 | 1,000 |
|                         | 23    | 0,000 | 0,000 | 0,876 | 0,124 | 1,000 |    |                         | 23    | 0,000 | 0,000 | 0,876 | 0,124 | 1,000 |
|                         | 24    | 0,000 | 0,000 | 1,000 | 0,000 | 1,000 |    |                         | 24    | 0,000 | 0,000 | 1,000 | 0,000 | 1,000 |
|                         | 26    | 0,000 | 0,000 | 1,000 | 0,000 | 1,000 |    |                         | 26    | 0,000 | 0,000 | 1,000 | 0,000 | 1,000 |
|                         | 28    | 0,000 | 0,000 | 0,961 | 0,039 | 1,000 |    |                         | 28    | 0,000 | 0,000 | 0,961 | 0,039 | 1,000 |
|                         | 29    | 0,000 | 0,000 | 1,000 | 0,000 | 1,000 |    |                         | 29    | 0,000 | 0,000 | 1,000 | 0,000 | 1,000 |
|                         | 32    | 0,000 | 0,000 | 1,000 | 0,000 | 1,000 |    |                         | 32    | 0,000 | 0,000 | 1,000 | 0,000 | 1,000 |
|                         | 33    | 0,000 | 0,000 | 1,000 | 0,000 | 1,000 |    |                         | 33    | 0,000 | 0,000 | 1,000 | 0,000 | 1,000 |
|                         | 34    | 0,000 | 0,000 | 1,000 | 0,000 | 1,000 |    |                         | 34    | 0,000 | 0,000 | 1,000 | 0,000 | 1,000 |
|                         | 35    | 0,200 | 0,000 | 0,800 | 0,000 | 1,000 |    |                         | 35    | 0,200 | 0,000 | 0,800 | 0,000 | 1,000 |
|                         | 36    | 0,270 | 0,000 | 0,730 | 0,000 | 1,000 |    |                         | 36    | 0,270 | 0,000 | 0,730 | 0,000 | 1,000 |
|                         | 37    | 0,270 | 0,000 | 0,730 | 0,000 | 1,000 |    |                         | 37    | 0,270 | 0,000 | 0,730 | 0,000 | 1,000 |
|                         | 38    | 0,550 | 0,000 | 0,450 | 0,000 | 1,000 |    |                         | 38    | 0,300 | 0,000 | 0,700 | 0,000 | 1,000 |
| 39                      | 0,550 | 0,000 | 0,450 | 0,000 | 1,000 |       | 39 | 0,300                   | 0,000 | 0,700 | 0,000 | 1,000 |       |       |
| 40                      | 0,550 | 0,000 | 0,450 | 0,000 | 1,000 |       | 40 | 0,450                   | 0,000 | 0,550 | 0,000 | 1,000 |       |       |
| 41                      | 0,550 | 0,000 | 0,450 | 0,000 | 1,000 |       | 41 | 0,450                   | 0,000 | 0,550 | 0,000 | 1,000 |       |       |
| 42                      | 0,550 | 0,000 | 0,450 | 0,000 | 1,000 |       | 42 | 0,450                   | 0,000 | 0,550 | 0,000 | 1,000 |       |       |
| 43                      | 0,350 | 0,000 | 0,650 | 0,000 | 1,000 |       | 43 | 0,240                   | 0,000 | 0,760 | 0,000 | 1,000 |       |       |
| 44                      | 0,000 | 0,200 | 0,800 | 0,000 | 1,000 |       | 44 | 0,000                   | 0,180 | 0,820 | 0,000 | 1,000 |       |       |
| 45                      | 0,200 | 0,000 | 0,800 | 0,000 | 1,000 |       | 45 | 0,200                   | 0,000 | 0,800 | 0,000 | 1,000 |       |       |
| 47                      | 0,200 | 0,000 | 0,800 | 0,000 | 1,000 |       | 47 | 0,200                   | 0,000 | 0,800 | 0,000 | 1,000 |       |       |
| 48                      | 0,350 | 0,000 | 0,650 | 0,000 | 1,000 |       | 48 | 0,240                   | 0,000 | 0,760 | 0,000 | 1,000 |       |       |
| 49                      | 0,000 | 0,000 | 1,000 | 0,000 | 1,000 |       | 49 | 0,000                   | 0,000 | 1,000 | 0,000 | 1,000 |       |       |
| <b>Non-living nodes</b> | 50    | 1,000 | 0,000 | 0,000 | 0,000 | 1,000 |    | <b>Non-living nodes</b> | 50    | 1,000 | 0,000 | 0,000 | 0,000 | 1,000 |
|                         | 51    | 0,000 | 1,000 | 0,000 | 0,000 | 1,000 |    |                         | 51    | 0,000 | 1,000 | 0,000 | 0,000 | 1,000 |
|                         | 52    | 0,000 | 0,000 | 1,000 | 0,000 | 1,000 |    |                         | 52    | 0,000 | 0,000 | 1,000 | 0,000 | 1,000 |
|                         | 53    | 0,000 | 0,000 | 0,000 | 1,000 | 1,000 |    |                         | 53    | 0,000 | 0,000 | 0,000 | 1,000 | 1,000 |

2007

| Maximum values | FN               | 50    | 51    | 52    | 53    | SUM   |       | Minimum values | FN | 50               | 51    | 52    | 53    | SUM   |       |       |
|----------------|------------------|-------|-------|-------|-------|-------|-------|----------------|----|------------------|-------|-------|-------|-------|-------|-------|
| Living nodes   | 1                | 0,000 | 0,000 | 0,870 | 0,130 | 1,000 |       | Living nodes   | 1  | 0,000            | 0,000 | 0,870 | 0,130 | 1,000 |       |       |
|                | 2                | 0,000 | 0,000 | 0,870 | 0,130 | 1,000 |       |                | 2  | 0,000            | 0,000 | 0,870 | 0,130 | 1,000 |       |       |
|                | 3                | 0,000 | 0,000 | 0,870 | 0,130 | 1,000 |       |                | 3  | 0,000            | 0,000 | 0,870 | 0,130 | 1,000 |       |       |
|                | 4                | 0,000 | 0,000 | 0,870 | 0,130 | 1,000 |       |                | 4  | 0,000            | 0,000 | 0,870 | 0,130 | 1,000 |       |       |
|                | 5                | 0,000 | 0,000 | 0,870 | 0,130 | 1,000 |       |                | 5  | 0,000            | 0,000 | 0,870 | 0,130 | 1,000 |       |       |
|                | 6                | 0,000 | 0,000 | 0,870 | 0,130 | 1,000 |       |                | 6  | 0,000            | 0,000 | 0,870 | 0,130 | 1,000 |       |       |
|                | 7                | 0,000 | 0,000 | 0,870 | 0,130 | 1,000 |       |                | 7  | 0,000            | 0,000 | 0,870 | 0,130 | 1,000 |       |       |
|                | 8                | 0,000 | 0,000 | 0,870 | 0,130 | 1,000 |       |                | 8  | 0,000            | 0,000 | 0,870 | 0,130 | 1,000 |       |       |
|                | 9                | 0,000 | 0,000 | 0,870 | 0,130 | 1,000 |       |                | 9  | 0,000            | 0,000 | 0,870 | 0,130 | 1,000 |       |       |
|                | 11               | 0,000 | 0,000 | 0,870 | 0,130 | 1,000 |       |                | 11 | 0,000            | 0,000 | 0,870 | 0,130 | 1,000 |       |       |
|                | 12               | 0,000 | 0,000 | 0,870 | 0,130 | 1,000 |       |                | 12 | 0,000            | 0,000 | 0,870 | 0,130 | 1,000 |       |       |
|                | 13               | 0,000 | 0,000 | 0,870 | 0,130 | 1,000 |       |                | 13 | 0,000            | 0,000 | 0,870 | 0,130 | 1,000 |       |       |
|                | 14               | 0,000 | 0,000 | 0,870 | 0,130 | 1,000 |       |                | 14 | 0,000            | 0,000 | 0,870 | 0,130 | 1,000 |       |       |
|                | 15               | 0,000 | 0,000 | 0,870 | 0,130 | 1,000 |       |                | 15 | 0,000            | 0,000 | 0,870 | 0,130 | 1,000 |       |       |
|                | 16               | 0,000 | 0,000 | 0,870 | 0,130 | 1,000 |       |                | 16 | 0,000            | 0,000 | 0,870 | 0,130 | 1,000 |       |       |
|                | 17               | 0,000 | 0,000 | 0,870 | 0,130 | 1,000 |       |                | 17 | 0,000            | 0,000 | 0,870 | 0,130 | 1,000 |       |       |
|                | 18               | 0,000 | 0,000 | 0,935 | 0,065 | 1,000 |       |                | 18 | 0,000            | 0,000 | 0,935 | 0,065 | 1,000 |       |       |
|                | 19               | 0,000 | 0,000 | 1,000 | 0,000 | 1,000 |       |                | 19 | 0,000            | 0,000 | 1,000 | 0,000 | 1,000 |       |       |
|                | 20               | 0,000 | 0,000 | 1,000 | 0,000 | 1,000 |       |                | 20 | 0,000            | 0,000 | 1,000 | 0,000 | 1,000 |       |       |
|                | 21               | 0,000 | 0,000 | 1,000 | 0,000 | 1,000 |       |                | 21 | 0,000            | 0,000 | 1,000 | 0,000 | 1,000 |       |       |
|                | 22               | 0,000 | 0,000 | 0,876 | 0,124 | 1,000 |       |                | 22 | 0,000            | 0,000 | 0,876 | 0,124 | 1,000 |       |       |
|                | 24               | 0,000 | 0,000 | 1,000 | 0,000 | 1,000 |       |                | 24 | 0,000            | 0,000 | 1,000 | 0,000 | 1,000 |       |       |
|                | 25               | 0,000 | 0,000 | 1,000 | 0,000 | 1,000 |       |                | 25 | 0,000            | 0,000 | 1,000 | 0,000 | 1,000 |       |       |
|                | 26               | 0,000 | 0,000 | 1,000 | 0,000 | 1,000 |       |                | 26 | 0,000            | 0,000 | 1,000 | 0,000 | 1,000 |       |       |
|                | 27               | 0,000 | 0,000 | 1,000 | 0,000 | 1,000 |       |                | 27 | 0,000            | 0,000 | 1,000 | 0,000 | 1,000 |       |       |
|                | 28               | 0,000 | 0,000 | 0,961 | 0,039 | 1,000 |       |                | 28 | 0,000            | 0,000 | 1,000 | 0,000 | 1,000 |       |       |
|                | 29               | 0,000 | 0,000 | 1,000 | 0,000 | 1,000 |       |                | 29 | 0,000            | 0,000 | 1,000 | 0,000 | 1,000 |       |       |
|                | 30               | 0,000 | 0,000 | 0,961 | 0,039 | 1,000 |       |                | 30 | 0,000            | 0,000 | 1,000 | 0,000 | 1,000 |       |       |
|                | 31               | 0,000 | 0,000 | 1,000 | 0,000 | 1,000 |       |                | 31 | 0,000            | 0,000 | 1,000 | 0,000 | 1,000 |       |       |
|                | 32               | 0,000 | 0,000 | 1,000 | 0,000 | 1,000 |       |                | 32 | 0,000            | 0,000 | 1,000 | 0,000 | 1,000 |       |       |
|                | 33               | 0,000 | 0,000 | 1,000 | 0,000 | 1,000 |       |                | 33 | 0,000            | 0,000 | 1,000 | 0,000 | 1,000 |       |       |
|                | 34               | 0,000 | 0,000 | 1,000 | 0,000 | 1,000 |       |                | 34 | 0,000            | 0,000 | 1,000 | 0,000 | 1,000 |       |       |
|                | 35               | 0,200 | 0,000 | 0,800 | 0,000 | 1,000 |       |                | 35 | 0,200            | 0,000 | 0,800 | 0,000 | 1,000 |       |       |
|                | 36               | 0,270 | 0,000 | 0,730 | 0,000 | 1,000 |       |                | 36 | 0,270            | 0,000 | 0,730 | 0,000 | 1,000 |       |       |
|                | 37               | 0,270 | 0,000 | 0,730 | 0,000 | 1,000 |       |                | 37 | 0,270            | 0,000 | 0,730 | 0,000 | 1,000 |       |       |
|                | 39               | 0,550 | 0,000 | 0,450 | 0,000 | 1,000 |       |                | 39 | 0,300            | 0,000 | 0,700 | 0,000 | 1,000 |       |       |
|                | 40               | 0,550 | 0,000 | 0,450 | 0,000 | 1,000 |       |                | 40 | 0,450            | 0,000 | 0,550 | 0,000 | 1,000 |       |       |
|                | 41               | 0,550 | 0,000 | 0,450 | 0,000 | 1,000 |       |                | 41 | 0,450            | 0,000 | 0,550 | 0,000 | 1,000 |       |       |
|                | 42               | 0,550 | 0,000 | 0,450 | 0,000 | 1,000 |       |                | 42 | 0,450            | 0,000 | 0,550 | 0,000 | 1,000 |       |       |
|                | 43               | 0,350 | 0,000 | 0,650 | 0,000 | 1,000 |       |                | 43 | 0,240            | 0,000 | 0,760 | 0,000 | 1,000 |       |       |
|                | 44               | 0,000 | 0,200 | 0,800 | 0,000 | 1,000 |       |                | 44 | 0,000            | 0,180 | 0,820 | 0,000 | 1,000 |       |       |
|                | 46               | 0,200 | 0,000 | 0,800 | 0,000 | 1,000 |       |                | 46 | 0,200            | 0,000 | 0,800 | 0,000 | 1,000 |       |       |
|                | 47               | 0,200 | 0,000 | 0,800 | 0,000 | 1,000 |       |                | 47 | 0,200            | 0,000 | 0,800 | 0,000 | 1,000 |       |       |
|                | 48               | 0,350 | 0,000 | 0,650 | 0,000 | 1,000 |       |                | 48 | 0,240            | 0,000 | 0,760 | 0,000 | 1,000 |       |       |
|                | 49               | 0,000 | 0,000 | 1,000 | 0,000 | 1,000 |       |                | 49 | 0,000            | 0,000 | 1,000 | 0,000 | 1,000 |       |       |
|                | Non-living nodes | 50    | 1,000 | 0,000 | 0,000 | 0,000 | 1,000 |                |    | Non-living nodes | 50    | 1,000 | 0,000 | 0,000 | 0,000 | 1,000 |
|                |                  | 51    | 0,000 | 1,000 | 0,000 | 0,000 | 1,000 |                |    |                  | 51    | 0,000 | 1,000 | 0,000 | 0,000 | 1,000 |
|                |                  | 52    | 0,000 | 0,000 | 1,000 | 0,000 | 1,000 |                |    |                  | 52    | 0,000 | 0,000 | 1,000 | 0,000 | 1,000 |
|                |                  | 53    | 0,000 | 0,000 | 0,000 | 1,000 | 1,000 |                |    |                  | 53    | 0,000 | 0,000 | 0,000 | 1,000 | 1,000 |
